TABLE 1—Système International (SI) units for plasma, serum, or blood concentrations

| MEASUREMENT                    | CONVENTIONAL UNIT | CONVERSION FACTOR | SI UNIT | SIGNIFICANT DIGITS | SUGGESTED MINIMUM INCREMENTS |
|--------------------------------|-------------------|-------------------|---------|--------------------|------------------------------|
| ACETOACETATE                   | mg/dl             | 97.95             | μmol/L  | XXO                | 10 μmol/L                    |
| ACETONE                        | mg/dl             | 172.2             | μmol/L  | XXO                | 10 μmol/L                    |
| ADRENOCORTICOTROPIN            | pg/ml             | 0.2202            | pmol/L  | XX                 | 1 pmol/L                     |
| ALDOSTERONE                    | ng/dl             | 27.74             | pmol/L  | XXO                | 10 pmol/L                    |
| AMINO ACIDS                    |                   |                   |         |                    |                              |
| ALANINE                        | mg/dl             | 112.2             | μmol/L  | XXX                | 5 μmol/L                     |
| α-AMINOBTYRIC ACID             | mg/dl             | 96.97             | μmol/L  | XXX                | 5 μmol/L                     |
| ARGININE                       | mg/dl             | 57.40             | μmol/L  | XXX                | 5 μmol/L                     |
| ASPARAGINE                     | mg/dl             | 75.69             | μmol/L  | XXX                | 5 μmol/L                     |
| ASPARTIC ACID                  | mg/dl             | 75.13             | μmol/L  |                    | 5 μmol/L                     |
| CITRULLINE                     | mg/dl             | 57.08             | μmol/L  | XXX                | 5 μmol/L                     |
| CYSTINE                        | mg/dl             | 41.61             | μmol/L  | XXX                | 5 μmol/L                     |
| GLUTAMIC ACID                  | mg/dl             | 67.97             | μmol/L  | XXX                | 5 μmol/L                     |
| GLUTAMINE                      | mg/dl             | 68.42             | μmol/L  | XXX                | 5 μmol/L                     |
| GLYCINE                        | mg/dl             | 133.2             | μmol/L  | XXX                | 5 μmol/L                     |
| HISTIDINE                      | mg/dl             | 64.45             | μmol/L  | XXX                | 5 μmol/L                     |
| HYDROXYPROLINE                 | mg/dl             | 76.26             | μmol/L  | XXX                | 5 μmol/L                     |
| ISOLEUCINE                     | mg/dl             | 76.24             | μmol/L  | XXX                | 5 μmol/L                     |
| LEUCINE                        | mg/dl             | 76.24             | μmol/L  | XXX                | 5 μmol/L                     |
| LYSINE                         | mg/dl             | 68.40             | μmol/L  | XXX                | 5 μmol/L                     |
| METHIONINE                     | mg/dl             | 67.02             | μmol/L  | XXX                | 5 μmol/L                     |
| ORNITHINE                      | mg/dl             | 75.67             | μmol/L  | XXX                | 5 μmol/L                     |
| PHENYLALANINE                  | mg/dl             | 60.54             | μmol/L  | XXX                | 5 μmol/L                     |
| PROLINE                        | mg/dl             | 86.86             | μmol/L  | XXX                | 5 μmol/L                     |
| SERINE                         | mg/dl             | 95.16             | μmol/L  | XXX                | 5 μmol/L                     |
| TAURINE                        | mg/dl             | 79.91             | μmol/L  | XXX                | 5 μmol/L                     |
| THREONINE                      | mg/dl             | 83.95             | μmol/L  | XXX                | 5 μmol/L                     |
| TRYPTOPHAN                     | mg/dl             | 48.97             | μmol/L  | XXX                | 5 μmol/L                     |
| TYROSINE                       | mg/dl             | 55.19             | μmol/L  | XXX                | 5 μmol/L                     |
| VALINE                         | mg/dl             | 85.36             | μmol/L  | XXX                | 5 μmol/L                     |
| AMINO ACID NITROGEN            | mg/dl             | 0.7139            | mmol/L  | XX                 | 0.1 mmol/L                   |
| AMYLASE                        | U/L               | 1.0               | U/L     | XXO                | 10 U/L                       |
| ANDROSTENEDIONE                | μg/L              | 3.492             | nmol/L  | XXX                | 0.5 nmol/L                   |
| CALCITONIN                     | pg/ml             | 1.0               | ng/L    | XXO                | 10 ng/L                      |
| CALCIUM                        | mg/dl             | 0.2495            | mmol/L  | X.XX               | 0.02 mmol/L                  |
| CALCIUM ION                    | meq/L             | 0.500             | mmol/L  | X.XX               | 0.01 mmol/L                  |
| CARBON DIOXIDE CONTENT         | meq/L             | 1.00              | nmol/L  | XX                 | 1 mmol/L                     |
| CHOLESTEROL                    | mg/dl             | 0.02586           | mmol/L  | X.XX               | 0.05 mmol/L                  |
| CITRATE (AS CITRIC ACID)       | mg/dl             | 52.05             | μmol/L  | XXX                | 5 μmol/L                     |
| CORTISOL                       | μg/dl             | 27.59             | nmol/L  | XXO                | 10 nmol/L                    |
| C-PEPTIDE                      | ng/ml             | 0.331             | nmol/L  | X.XX               | 0.01 nmol/L                  |
| CREATININE                     | mg/dl             | 88.40             | μmol/L  | XXO                | 10 μmol/L                    |
| CREATININE CLEARANCE           | ml/min            | 0.01667           | ml/s    | X.XX               | 0.02 ml/s                    |
| CYCLIC AMP                     | μg/L              | 3.038             | nmol/L  | XXX                | 1 nmol/L                     |
| CYCLIC GMP                     | μg/L              | 2.897             | nmol/L  | XXX                | 0.1 nmol/L                   |
| DEHYDROEPIANDROSTERONE         | μg/L              | 3.467             | nmol/L  | XXX                | 0.2 nmol/L                   |
| DEHYDROEPIANDROSTERONE SULFATE | ng/ml             | 0.002714          | μmol/L  | XXX                | 0.1 μmol/L                   |
| 11-DEOXYCORTISOL               | μg/dl             | 28.86             | nmol/L  | XXO                | 10 nmol/L                    |
| EPINEPHRINE                    | pg/ml             | 5.458             | pmol/L  | XXO                | 10 pmol/L                    |
| ESTRADIOL                      | pg/ml             | 3.671             | pmol/L  | XXX                | 1 pmol/L                     |

TABLE 1—Continued

| MEASUREMENT                                  | CONVENTIONAL UNIT                       | CONVERSION FACTOR | SI UNIT                                | SIGNIFICANT DIGITS | SUGGESTED MINIMUM INCREMENTS                |
|----------------------------------------------|-----------------------------------------|-------------------|----------------------------------------|--------------------|---------------------------------------------|
| ESTRONE                                      | pg/ml                                   | 3.699             | pmol/L                                 | XXX                | 5 pmol/L                                    |
| FATTY ACIDS, NONESTERIFIED                   | mg/dl                                   | 0.01              | g/L                                    | X.XX               | 0.01 g/L                                    |
| FOLLICLE-STIMULATING HORMONE                 | mIU/ml                                  | 1.00              | IU/L                                   | XX                 | 1 IU/L                                      |
| FRUCTOSE                                     | mg/dl                                   | 0.05551           | mmol/L                                 | X.XX               | 0.1 mmol/L                                  |
| GALACTOSE                                    | mg/dl                                   | 0.05551           | mmol/L                                 | X.XX               | 0.1 mmol/L                                  |
| GASES                                        |                                         |                   |                                        |                    |                                             |
| PO <sub>2</sub>                              | mmHg                                    | 0.1333            | kPa                                    | XXX                | 0.1 kPa                                     |
| PCO <sub>2</sub>                             | mmHg                                    | 0.1333kPa         | XX                                     | 0.1 kPa            |                                             |
| GASTRIN                                      | pg/ml                                   | 1.0               | ng/L                                   | XXO                | 10 ng/L                                     |
| GASTROINHIBITORY POLYPEPTIDE                 | pg/ml                                   | 0.201             | pmol/L                                 | XXO                | 10 pmol/L                                   |
| GLUCAGON                                     | pg/ml                                   | 1.0               | ng/L                                   | XXO                | 10 ng/L                                     |
| GLUCOSE                                      | mg/dl                                   | 0.05551           | mmol/L                                 | XXX                | 0.1 mmol/L                                  |
| GLYCEROL, FREE                               | mg/dl                                   | 0.1086            | mmol/L                                 | X.XX               | 0.01 mmol/L                                 |
| GROWTH HORMONE                               | ng/ml                                   | 1.0               | μg/L                                   | XXX                | 0.5 μg/L                                    |
| β-HYDROXYBUTYRATE (AS β-HYDROXYBUTYRIC ACID) | mg/dl                                   | 96.05             | μmol/L                                 | XXO                | 10 μmol/L                                   |
| 17A-HYDROXYPROGESTERONE                      | μg/L                                    | 3.026             | nmol/L                                 | XXX                | 0.5 nmol/L                                  |
| INSULIN                                      | μU/ml                                   | 7.17              | pmol/L                                 | XXX                | 5 pmol/L                                    |
| LACTATE (AS LACTIC ACID)                     | mEq/L                                   | 1.0               | mmol/L                                 | X.X                | 0.1 mmol/L                                  |
| LIPASE                                       | U/L                                     | 1.0               | U/L                                    | XXX                | 1 U/L                                       |
| LIPOPROTEINS                                 |                                         |                   |                                        | X.XX               |                                             |
| LDL (AS CHOLESTEROL)                         | mg/dl                                   | 0.02586           | mmol/L                                 | X.XX               | 0.05 mmol/L                                 |
| HDL (AS CHOLESTEROL)                         | mg/dl                                   | 0.02586           | mmol/L                                 | XXX                | 0.05 mmol/L                                 |
| LUTEINIZING HORMONE                          | mIU/ml                                  | 1.0               | IU/L                                   | X.XX               | 1 IU/L                                      |
| NOREPINEPHRINE                               | pg/ml                                   | 0.005911          | nmol/L                                 | XXX                | 0.01 nmol/L                                 |
| OSMOLALITY                                   | mOsm/kg                                 | 1.0               | mmol/kg                                | XX                 | 1 mmol/k                                    |
| PANCREATIC POLYPEPTIDE                       | pg/ml                                   | 0.239             | pmol/L                                 |                    | 1 pmol/L                                    |
| PHOSPHATE (AS INORGANIC PHOSPHORUS)          |                                         |                   |                                        | X.XX               |                                             |
|                                              | mg/dl                                   | 0.3229            | mmol/L                                 | X.XX               | 0.05 mmol/L                                 |
| PHOSPHOLIPID PHOSPHORUS                      | mg/dl                                   | 0.3229            | mmol/L                                 | XX                 | 0.05 mmol/L                                 |
| PROGESTERONE                                 | ng/ml                                   | 3.180             | nmol/L                                 | XX                 | 2 nmol/L                                    |
| PROLACTIN                                    | ng/ml                                   | 1.0               | μg/L                                   | XX                 | 1 μg/L                                      |
| PROTEIN, TOTAL                               | g/dl                                    | 10.0              | g/L                                    | XX                 | 1 g/L                                       |
| PYRUVATE (AS PYRUVIC ACID)                   | mg/dl                                   | 113.6             | μmol/L                                 | XXX                | 1 μmol/L                                    |
| RENIN                                        | ng · ml <sup>-1</sup> · h <sup>-1</sup> | 0.2778            | ng · L <sup>-1</sup> · s <sup>-1</sup> | X.XX               | 0.02 ng · L <sup>-1</sup> · s <sup>-1</sup> |
| SEROTONIN                                    | μg/dl                                   | 0.05675           | μmol/L                                 | X.XX               | 0.05 μmol/L                                 |
| SOMATOSTATIN                                 | pg/ml                                   | 0.611             | pmol/L                                 | XX                 | 1 pmol/L                                    |
| TESTOSTERONE                                 | ng/ml                                   | 3.467             | nmol/L                                 | XXX                | 0.5 nmol/L                                  |
| THYROID-STIMULATING HORMONE                  | μU/dl                                   | 1.0               | mU/L                                   | X.X                | 0.1 mU/L                                    |
| THYROXINE                                    | μg/dl                                   | 12.87             | nmol/L                                 | XXX                | 1 nmol/L                                    |
| TRIIODOTHYRONINE                             | ng/dl                                   | 0.01536           | nmol/L                                 | XX                 | 0.1 nmol/L                                  |
| UREA NITROGEN                                | mg/dl                                   | 0.3570            | mmol/L                                 | X.X                | 0.5 mmol/L                                  |
| VASOACTIVE INTESTINAL POLYPEPTIDE            | pg/ml                                   | 0.331             | pmol/L                                 | X.X                | 1 pmol/L                                    |

From Young DS: *Ann Intern Med* 106:114–29, 1987.

Downloaded from <http://ada.silverchair.com/care/article-pdf/15/10/1447/440930/15-10-1447.pdf> by guest on 18 April 2024
